# Supplementary material for: Small-molecule HDAC and Akt inhibitors suppress tumor growth and enhance immunotherapy in multiple myeloma
Source: PubMed Central journal article supplement (PMC7989023; doi:10.1186/s13046-021-01909-7), 2021-03-23

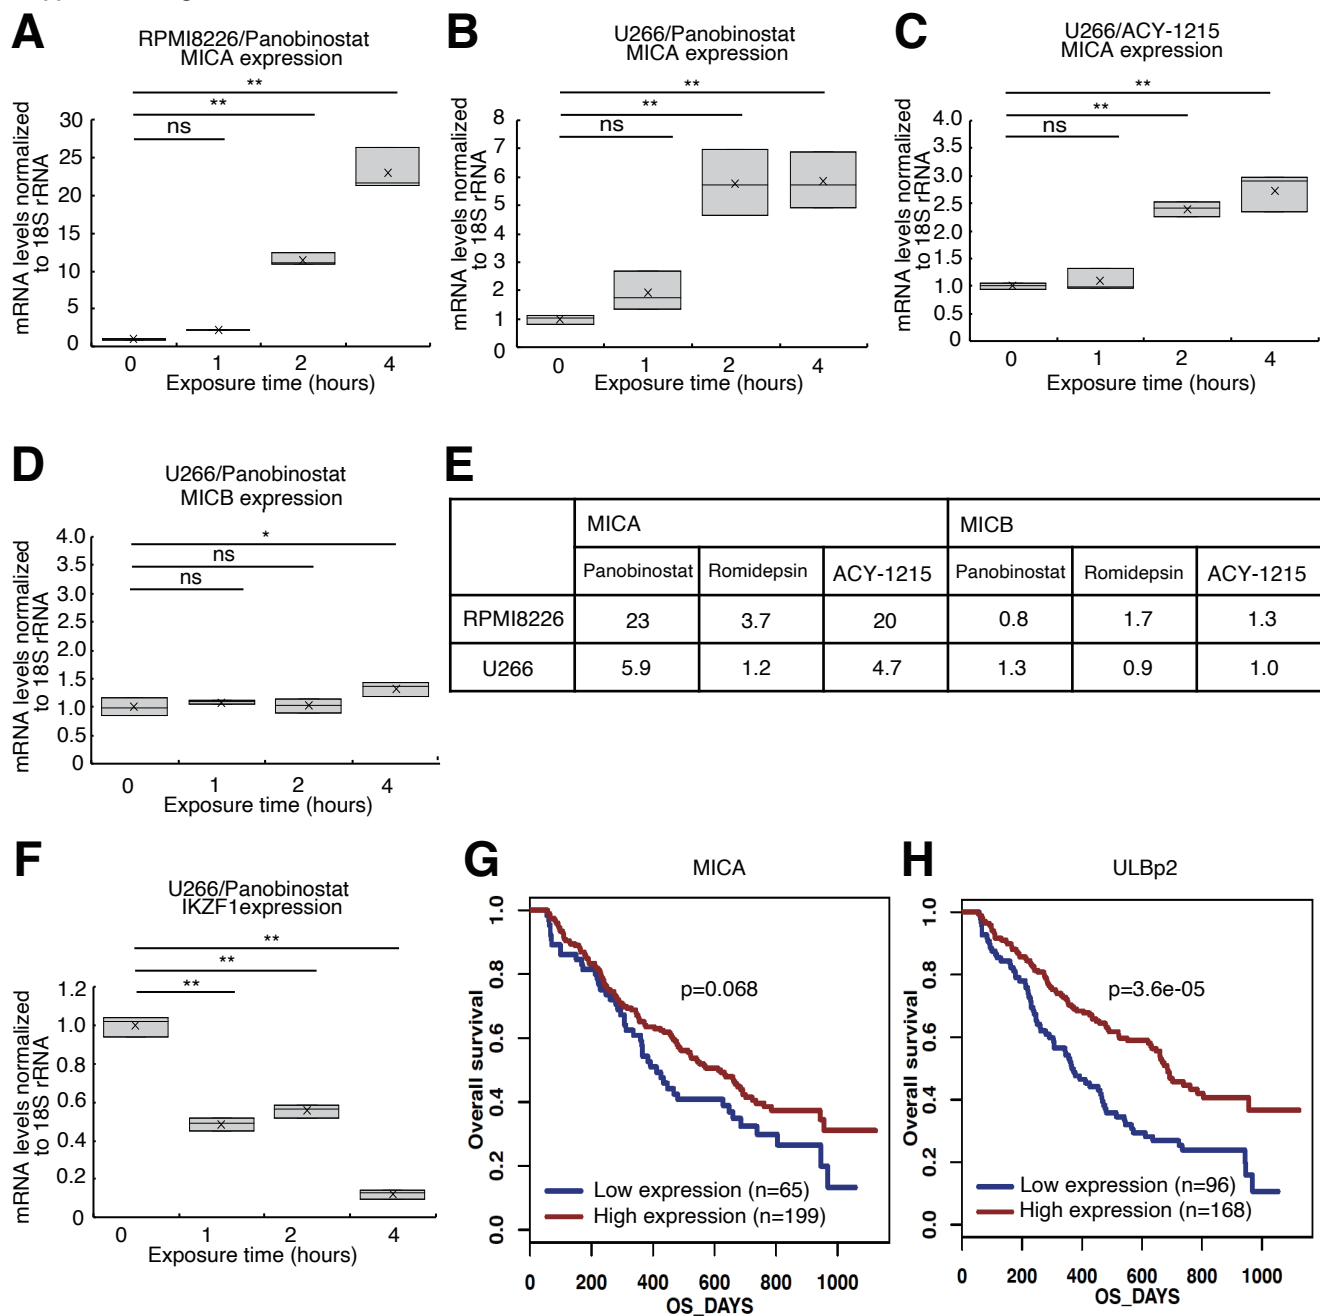

Supplement: 13046_2021_1909_MOESM1_ESM.pdf [file 13046_2021_1909_MOESM1_ESM.pdf]
